# Supplementary material for: Wearable Activity Trackers Objectively Measure Incidental Physical Activity in Older Adults Undergoing Aortic Valve Replacement
Source: MDPI journal article supplement (doi:10.3390/s23063347), 2023-03-22
Supplement: s1 [file s1]

# Supplementary Table S1: Change correlation matrix

As per Figure 2, and the values below, there were no associations between change in 6MWT and change in objective PA measures.

|                   | 6MWT     | Steps    | MVPA     | Sed hrs | Light PA | Mod PA | Vig PA  | Age    | Sex    | Marital status | Treatment | Charlson CI | Ejection Fraction | NYHA class | 5MWT      | Gait speed | Grip strength | SF-12 PCS | SF-12 MCS |
|-------------------|----------|----------|----------|---------|----------|--------|---------|--------|--------|----------------|-----------|-------------|-------------------|------------|-----------|------------|---------------|-----------|-----------|
| 6MWT              | 1        |          |          |         |          |        |         |        |        |                |           |             |                   |            |           |            |               |           |           |
| Steps             | 0.258    | 1        |          |         |          |        |         |        |        |                |           |             |                   |            |           |            |               |           |           |
| MVPA              | -0.001   | 0.595    | 1        |         |          |        |         |        |        |                |           |             |                   |            |           |            |               |           |           |
| Sed hrs           | 0.213    | -0.151   | -0.088   | 1       |          |        |         |        |        |                |           |             |                   |            |           |            |               |           |           |
| Light PA          | 0.471    | 0.890*** | 0.663*   | -0.142  | 1        |        |         |        |        |                |           |             |                   |            |           |            |               |           |           |
| Mod PA            | 0.015    | 0.796**  | 0.858**  | -0.222  | 0.814**  | 1      |         |        |        |                |           |             |                   |            |           |            |               |           |           |
| Vig PA            | -0.015   | 0.287    | 0.896*** | 0.048   | 0.382    | 0.541  | 1       |        |        |                |           |             |                   |            |           |            |               |           |           |
| Age               | -0.383   | 0.256    | 0.171    | -0.161  | -0.008   | 0.299  | 0.022   | 1      |        |                |           |             |                   |            |           |            |               |           |           |
| Sex               | 0.066    | 0.464    | 0.138    | -0.245  | 0.432    | 0.22   | 0.037   | 0.409  | 1      |                |           |             |                   |            |           |            |               |           |           |
| Marital status    | 0.326    | 0.365    | -0.03    | -0.092  | 0.251    | 0.15   | -0.179  | -0.287 | -0.356 | 1              |           |             |                   |            |           |            |               |           |           |
| Treatment         | 0.481    | 0.381    | -0.072   | 0.021   | 0.254    | -0.008 | -0.111  | 0.255  | 0.356  | -0.048         | 1         |             |                   |            |           |            |               |           |           |
| Charlson CI       | -0.091   | -0.032   | -0.133   | -0.002  | -0.159   | -0.053 | -0.173  | 0.648* | 0.47   | -0.168         | 0.028     | 1           |                   |            |           |            |               |           |           |
| Ejection Fraction | 0.006    | 0.631    | 0.312    | 0.142   | 0.57     | 0.664* | -0.062  | 0.354  | 0.15   | 0.271          | -0.099    | 0.115       | 1                 |            |           |            |               |           |           |
| NYHA class        | 0.476    | 0.174    | 0.451    | 0.159   | 0.369    | 0.223  | 0.546   | 0.124  | 0.356  | -0.524         | 0.524     | 0.028       | -0.176            | 1          |           |            |               |           |           |
| 5MWT              | -0.860** | -0.562   | -0.274   | 0.148   | -0.711*  | -0.3   | -0.189  | 0.346  | -0.189 | -0.492         | -0.451    | 0.231       | -0.057            | -0.384     | 1         |            |               |           |           |
| Gait speed        | 0.840**  | 0.519    | 0.247    | -0.13   | 0.694*   | 0.254  | 0.186   | -0.476 | 0.163  | 0.481          | 0.389     | -0.33       | 0.005             | 0.344      | -0.987*** | 1          |               |           |           |
| Grip strength     | 0.662*   | 0.002    | -0.373   | -0.135  | 0.197    | -0.249 | -0.396  | -0.161 | 0.484  | -0.146         | 0.511     | 0.221       | -0.21             | 0.402      | -0.492    | 0.486      | 1             |           |           |
| SF-12 PCS         | 0.249    | -0.211   | -0.764*  | 0.088   | -0.352   | -0.582 | -0.748* | 0.221  | 0.266  | 0.044          | 0.442     | 0.593       | -0.154            | -0.117     | 0.014     | -0.066     | 0.603         | 1         |           |
| SF-12 MCS         | 0.498    | 0.28     | 0.328    | -0.202  | 0.264    | 0.149  | 0.408   | -0.107 | 0.002  | 0.468          | 0.301     | 0.112       | -0.325            | 0.281      | -0.663*   | 0.616      | 0.148         | 0.032     | 1         |
